# Supplementary material for: 7,8-dihydro-8-oxoadenine, a highly mutagenic adduct, is repaired by Escherichia coli and human mismatch-specific uracil/thymine-DNA glycosylases
Source: PubMed Central journal article supplement — Nucleic Acids Res. 2012 Dec 2;41(2):912–23. doi: 10.1093/nar/gks1149 (PMC3553953; doi:10.1093/nar/gks1149), 2012-12-02
Supplement: supp_gks1149_nar-01517-d-2012-File007.pdf [file supp_gks1149_nar-01517-d-2012-File007.pdf]

## SUPPLEMENTARY MATERIAL FOR

### **7,8-dihydro-8-oxoadenine, a Highly Mutagenic Adduct, is repaired by *E. coli* and Human Mismatch-Specific Uracil/Thymine-DNA Glycosylases**

Ibtissam TALHAOUI<sup>1,3</sup>, Sophie COUVE<sup>1,3</sup>, Alexander A. ISHCENKO<sup>1</sup>, Christophe KUNZ<sup>2</sup>, Primo SCHÄR<sup>2</sup>, Murat SAPARBAEV<sup>1,\*</sup>

<sup>1</sup>Groupe «Réparation de l'ADN», Université Paris Sud, Laboratoire « Stabilité Génétique et Oncogenèse » CNRS, UMR 8200, Institut de Cancérologie Gustave Roussy, F-94805 Villejuif Cedex, France

<sup>2</sup>Department of Biomedicine, University of Basel, Basel, CH-4058 Switzerland

\*To whom correspondence should be addressed. Tel: +33142115404; Fax: +33142115008; Email: [smurat@igr.fr](mailto:smurat@igr.fr)

<sup>3</sup>The authors wish it to be known that, in their opinion, the first two authors should be regarded as joint First Authors

**This file includes: Supplementary Tables S1 and S2 and Supplementary Figure S1 to Figure S4.**

## Supplementary Data Tables

**Table S1.** Pre-steady-state kinetic parameters of hTDG-catalyzed excision of 8oxoA when paired with various bases

|                                               | Substrate   |             |             |         |
|-----------------------------------------------|-------------|-------------|-------------|---------|
|                                               | 8oxoA•T     | 8oxoA•C     | 8oxoA•G     | 8oxoA•A |
| $k_{\max}$ ( $\text{min}^{-1}$ ) <sup>a</sup> | 0.35 ± 0.05 | 0.32 ± 0.04 | 1.64 ± 0.05 | ND      |

<sup>a</sup> $k_{\max}$  constants were calculated by one phase exponential association equation using GraphPad Prism 5.

**Table S2.** Sequence of the 40 mer oligonucleotides used in this study, where X is 8oxoA.

| Name of the oligonucleotide duplex | DNA sequence of oligonucleotide substrates                                                                          |
|------------------------------------|---------------------------------------------------------------------------------------------------------------------|
| 8oxoA•T <sup>a</sup>               | 5'-AATTGCTATCTAGCTCCGC <u>X</u> CGCTGGTACCCATCTCATGA-3'<br>3'-TTAACGATAGATCGAGGCG <u>T</u> GCGACCATGGGTAGAGTACT-5'  |
| U•G <sup>b</sup>                   | 5'-AATTGCTATCTAGCTCCGC <u>U</u> GGCTGGTACCCATCTCATGA-3'<br>3'-TTAACGATAGATCGAGGCG <u>G</u> CCGACCATGGGTAGAGTACT-5'  |
| εC•G <sup>a</sup>                  | 5'-AATTGCTATCTAGCTCCGC <u>ε</u> CGCTGGTACCCATCTCATGA-3'<br>3'-TTAACGATAGATCGAGGCG <u>G</u> GCGACCATGGGTAGAGTACT-5'  |
| T•G <sup>b</sup>                   | 5'-AATTGCTATCTAGCTCCGC <u>T</u> GGCTGGTACCCATCTCATGA-3'<br>3'-TTAACGATAGATCGAGGCG <u>G</u> CCGACCATGGGTAGAGTACT-5'  |
| CXC (8oxoA•A)                      | 5'-AATTGCTATCTAGCTCCGC <u>X</u> CGCTGGTACCCATCTCATGA-3'<br>3'-TTAACGATAGATCGAGGCG <u>A</u> GCGACCATGGGTAGAGTACT-5'  |
| CXC (8oxoA•C)                      | 5'-AATTGCTATCTAGCTCCGC <u>X</u> CGCTGGTACCCATCTCATGA-3'<br>3'-TTAACGATAGATCGAGGCG <u>C</u> GCGACCATGGGTAGAGTACT-5'  |
| CXC (8oxoA•G)                      | 5'-AATTGCTATCTAGCTCCGC <u>X</u> CGCTGGTACCCATCTCATGA-3'<br>3'-TTAACGATAGATCGAGGCG <u>G</u> GCGACCATGGGTAGAGTACT-5'  |
| GXC (8oxoA•T)                      | 5'-AATTGCTATCTAGCTCCGC <u>G</u> XCGCTGGTACCCATCTCATGA-3'<br>3'-TTAACGATAGATCGAGGCC <u>T</u> GCGACCATGGGTAGAGTACT-5' |
| AXC (8oxoA•T)                      | 5'-AATTGCTATCTAGCTCCG <u>A</u> XCGCTGGTACCCATCTCATGA-3'<br>3'-TTAACGATAGATCGAGGCT <u>T</u> GCGACCATGGGTAGAGTACT-5'  |
| TXC (8oxoA•T)                      | 5'-AATTGCTATCTAGCTCCG <u>T</u> XCGCTGGTACCCATCTCATGA-3'<br>3'-TTAACGATAGATCGAGGCAT <u>T</u> GCGACCATGGGTAGAGTACT-5' |
| CXG (8oxoA•T)                      | 5'-AATTGCTATCTAGCTCCGC <u>X</u> GGCTGGTACCCATCTCATGA-3'<br>3'-TTAACGATAGATCGAGGCG <u>T</u> CCGACCATGGGTAGAGTACT-5'  |
| CXA (8oxoA•T)                      | 5'-AATTGCTATCTAGCTCCGC <u>X</u> AGCTGGTACCCATCTCATGA-3'<br>3'-TTAACGATAGATCGAGGCG <u>T</u> TCGACCATGGGTAGAGTACT-5'  |
| CXT (8oxoA•T)                      | 5'-AATTGCTATCTAGCTCCGC <u>X</u> TGCTGGTACCCATCTCATGA-3'<br>3'-TTAACGATAGATCGAGGCG <u>T</u> ACGACCATGGGTAGAGTACT-5'  |

<sup>a</sup>The sequence context used in the standard DNA repair reactions and for the kinetic parameters measurements of 8oxoA- and εC-DNA glycosylase activities, unless otherwise stated.

<sup>b</sup>The sequence context used in the standard DNA repair reactions and for the kinetic parameters measurements of mismatched uracil- and thymine-DNA glycosylase activities, unless otherwise stated.

## Figures

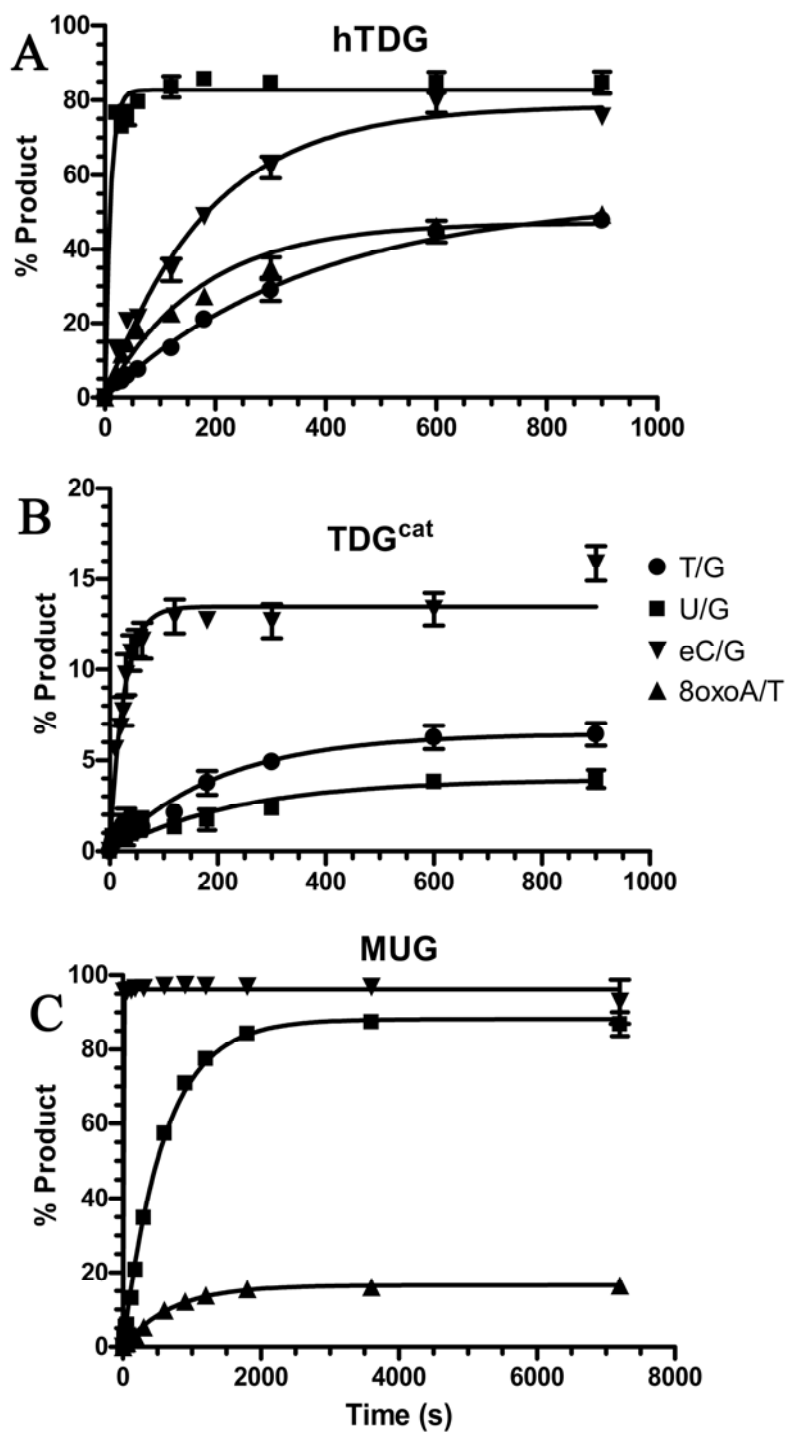

**Figure S1. Pre-steady-state single-turnover kinetic of hTDG, hTDG<sup>cat</sup> and MUG DNA glycosylases.** Single-turnover kinetic experiments were performed at 37°C using 500 nM of TDGs or 5 μM of MUG in reaction buffer containing 20 mM Tris (pH 8.0), 1 mM EDTA, 1 mM DTT, 100 μg/ml BSA and 100 mM NaCl and 50 nM 5'-[<sup>32</sup>P]-labelled oligonucleotide duplex U•G (■), εC•G (▼), 8oxoA•T (▲) or T•G (●). (A) hTDG. (B) TDG<sup>cat</sup>. (C) MUG. The data were fitted to the one phase exponential association equation to calculate  $k_{max}$  constant.

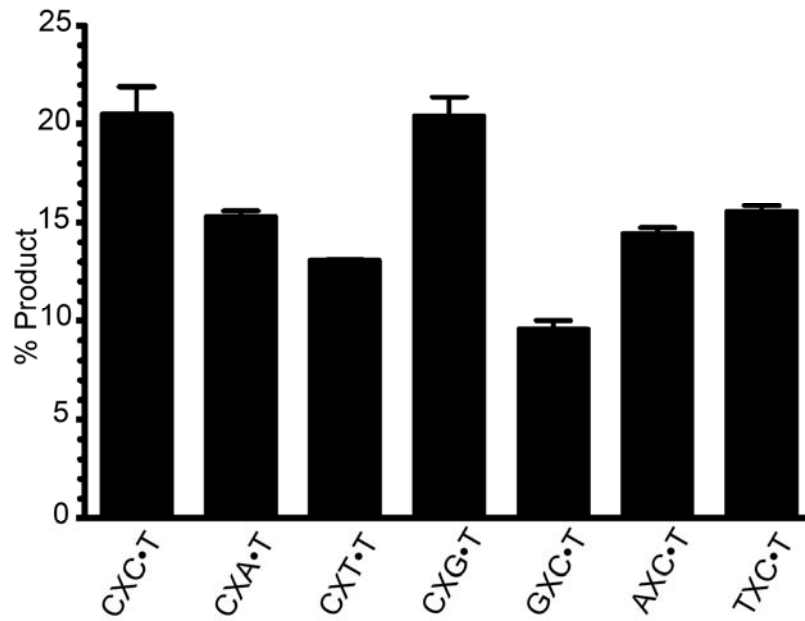

**Figure S2. Effects of DNA sequence context on 8oxoA-DNA glycosylase activity of hTDG.** 40 mer 8oxoA•T duplex oligonucleotides containing 8oxoA residue placed in different sequence context: CXC, CXA, CXT, CXG, GXC, AXC and TXC, where X is a 8oxoA residue, were used as DNA substrates. 50 nM of 8oxoA•T (5 nM of 5'-[<sup>32</sup>P]-labelled and 45 nM of non-labelled duplexes) was incubated with 50 nM of hTDG for 15 min at 37°C. Each bar represents the mean values of hTDG activity ± S.D. of three independent experiments. For details see Materials and Methods.

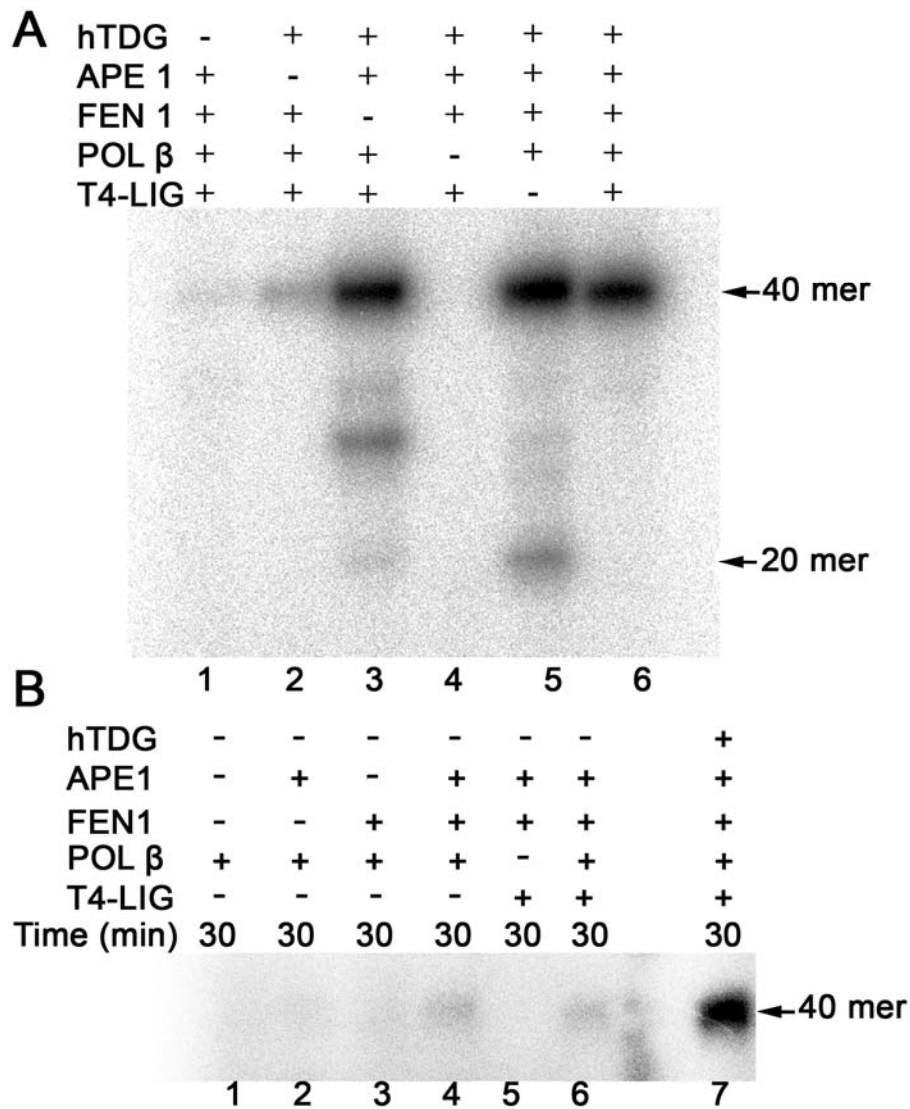

**Figure S3. *In vitro* reconstitution of the human BER pathway using 8oxoA•T duplex DNA substrate and purified proteins.** 5 nM of 8oxoA•T oligonucleotide duplex was incubated in the presence of 20 nM hTDG, 5 nM APE1, 2 nM FEN1, 0.1 units POL $\beta$  and 5 nM T4 DNA Ligase in buffer containing 20  $\mu$ Ci of [ $\alpha$ - $^{32}$ P]dATP, 50  $\mu$ M dNTPs, 50 mM HEPES-KOH (pH 7.6), 30 mM NaCl, 0.1 mg/mL BSA, 2 mM DTT, 2 mM ATP and 3 mM MgCl $_2$  for 30 min at 37°C, unless otherwise stated. **(A)** Gel analysis of all reaction products in the presence or absence of one of the five DNA repair proteins. Lane 1, no hTDG; lane 2, no APE1; lane 3, no FEN1; lane 4, no POL $\beta$ ; lane 5, no T4 DNA Ligase; lane 6, all enzymes. **(B)** Generation of full-length repaired product depending on the presence of DNA repair proteins. Lane 1, POL $\beta$ ; lane 2, POL $\beta$  and APE1; lane 3, POL $\beta$  and FEN1; lane 4, POL $\beta$ , APE1 and FEN1; lane 5, APE1, FEN1 and T4 DNA Ligase; lane 6, all enzymes except hTDG; lane 7, all enzymes. For details see Materials and Methods.

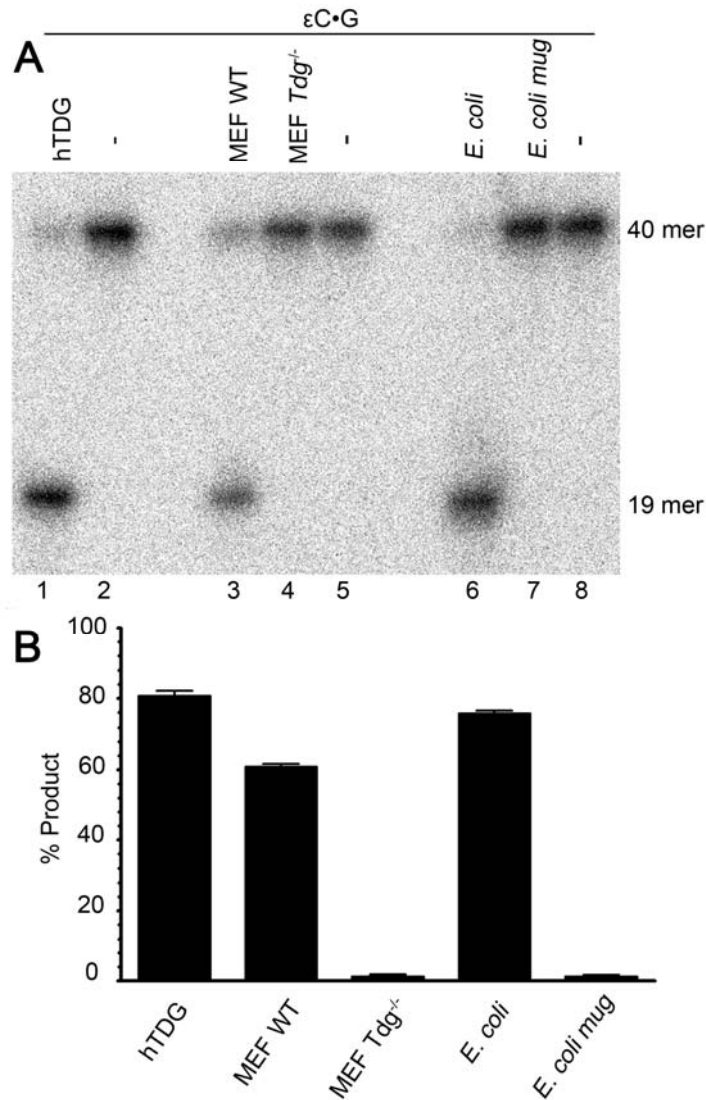

**Figure S4. Repair activities toward  $\epsilon$ C•G duplex oligonucleotide in extracts from *E. coli* and MEF cells.** 2.5 nM of 5'-[<sup>32</sup>P]-labelled  $\epsilon$ C•G oligonucleotide duplexes were incubated with either 30  $\mu$ g of MEFs extract, or 20  $\mu$ g of *E. coli* cell extract or the purified 50 nM hTDG and 20 nM APE1 proteins. The repair assay (volume 100  $\mu$ l) was performed in BER+EDTA buffer containing 50 mM KCl, 20 mM HEPES-KOH (pH 7.6), 0.1 mg/ml BSA, 1 mM DTT and 1 mM EDTA for 1 h at 37°C. The reactions were stopped by adding SDS and proteinase K. **(A)** Denaturing PAGE analysis of the cleavage products after incubation of  $\epsilon$ C•G duplexes with *E. coli* cell extracts. **(B)** Graphic representation of the mean values of cleavage activities in *E. coli* and MEF cell extracts. For details see Materials and Methods.
